# Supplementary material
Source: PubMed Central journal article supplement (PMC4821741)
Supplement: NIHMS751394-supplement-Supplemental_Digital_Content.pdf [file NIHMS751394-supplement-Supplemental_Digital_Content.pdf]

## Supplemental Digital Content

|                                                                                                                                                                                                                                                                                                                              |    |
|------------------------------------------------------------------------------------------------------------------------------------------------------------------------------------------------------------------------------------------------------------------------------------------------------------------------------|----|
| eAppendix: Specification of missing data models .....                                                                                                                                                                                                                                                                        | 2  |
| eFigure 1. Posterior mean of odds ratios or beta coefficients and 95% credible intervals for the associations of natural log urinary MCPP concentrations modeled using restricted quadratic spline terms with overweight/obese status and BMI z-scores among children aged 4 to 7 years (N=707; 1,416 follow-up visits)..... | 3  |
| eTable 1. Distributions of phthalate metabolite concentrations ( $\mu\text{g/L}$ ) in maternal urine samples during pregnancy, by cohort and pooled (N=707) .....                                                                                                                                                            | 4  |
| eTable 2. Age- and sex- standardized body mass index z-score distributions (mean $\pm$ standard deviation) at follow-up by selected characteristics (N=707; 1,416 follow up visits) .....                                                                                                                                    | 6  |
| eTable 3. Adjusted OR (95% CI) for associations between prenatal urinary phthalate metabolite concentrations and overweight/obese status by cohort, child's sex, and race/ethnicity .....                                                                                                                                    | 7  |
| eTable 4. Adjusted (95% CI) for associations between prenatal urinary phthalate metabolite concentrations and body mass index z-scores by cohort, child's sex, and race/ethnicity.....                                                                                                                                       | 9  |
| eTable 5. Sensitivity analyses for confounding among metabolites and loss to follow-up.....                                                                                                                                                                                                                                  | 11 |

## eAppendix: Specification of missing data models

We modeled natural log creatinine as a normally distributed random variable predicted by specific gravity; gestational age and calendar date at urine collection; maternal education, race/ethnicity, parity, BMI, and height; child's sex; and gestational weight gain. We modeled breast feeding status using a logistic model conditional on cohort, maternal education, race/ethnicity, parity, and maternal smoking during pregnancy. We modeled maternal pre-pregnancy weight, maternal last pregnancy weight, and maternal height as normally distributed random variables conditional on cohort, maternal education, race/ethnicity, parity, maternal smoking during pregnancy, maternal work status during pregnancy, child's sex, and maternal age at delivery. For each iteration of the MCMC algorithm, maternal pre-pregnancy BMI and gestational weight gain were calculated based on these imputed values.

eFigure 1. Posterior mean of odds ratios or beta coefficients and 95% credible intervals for the associations of natural log urinary MCP concentrations modeled using restricted quadratic spline terms with overweight/obese status (a) and BMI z-scores (b) among children aged 4 to 7 years (N=707; 1,416 follow-up visits). Associations estimated in multiple metabolite logistic or linear mixed effects regression models adjusted for cohort, maternal race/ethnicity, maternal age at delivery, maternal education, maternal work status during pregnancy, maternal pre-pregnancy BMI, maternal height, gestational weight gain, maternal smoking during pregnancy, natural log creatinine, calendar date of urine collection, parity, child's sex, breast feeding, and months of age at follow-up.

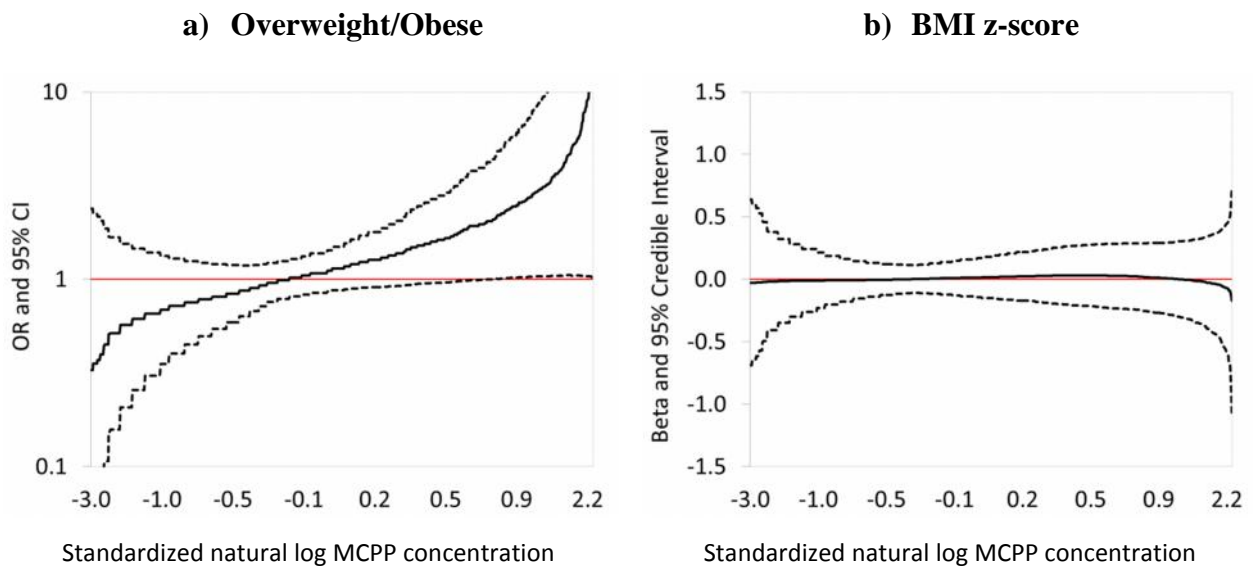

eTable 1. Distributions of phthalate metabolite concentrations ( $\mu\text{g/L}$ ) in maternal urine samples during pregnancy, by cohort and pooled (N=707)

| Metabolite/<br>cohort   | N   | LOD | Percent<br>detected | Geometric<br>mean <sup>a</sup> | Minimum | 25 <sup>th</sup><br>percentile | 75 <sup>th</sup><br>percentile | Maximum |
|-------------------------|-----|-----|---------------------|--------------------------------|---------|--------------------------------|--------------------------------|---------|
| <b>MEP</b>              |     |     |                     |                                |         |                                |                                |         |
| MSSM                    | 151 | 0.3 | 99                  | 198.9                          | <LOD    | 81.0                           | 495                            | 7819    |
| CCCEH                   | 339 | 0.5 | 100                 | 162.0                          | 7.79    | 69.4                           | 334                            | 6046    |
| HOME                    | 217 | 0.5 | 100                 | 119.3                          | 3.30    | 36.0                           | 335                            | 26004   |
| Pooled                  | 707 |     | 100                 | 154.1                          | <LOD    | 63.4                           | 353                            | 26004   |
| <b>MnBP</b>             |     |     |                     |                                |         |                                |                                |         |
| MSSM                    | 151 | 0.4 | 100                 | 32.0                           | 0.800   | 14.3                           | 75.2                           | 4043    |
| CCCEH                   | 339 | 0.6 | 100                 | 38.0                           | 1.20    | 20.3                           | 81.3                           | 1110    |
| HOME                    | 217 | 0.6 | 100                 | 21.1                           | 0.800   | 8.50                           | 49.1                           | 2240    |
| Pooled                  | 707 |     | 100                 | 30.6                           | 0.800   | 14.2                           | 66.5                           | 4043    |
| <b>MiBP</b>             |     |     |                     |                                |         |                                |                                |         |
| MSSM                    | 151 | 0.3 | 97                  | 5.96                           | <LOD    | 2.90                           | 15.3                           | 76.6    |
| CCCEH                   | 339 | 0.3 | 100                 | 9.22                           | <LOD    | 5.10                           | 19.0                           | 374     |
| HOME                    | 217 | 0.3 | 95                  | 3.90                           | <LOD    | 1.50                           | 11.4                           | 84.1    |
| Pooled                  | 707 |     | 98                  | 6.45                           | <LOD    | 3.20                           | 15.9                           | 374     |
| <b>MCPP</b>             |     |     |                     |                                |         |                                |                                |         |
| MSSM                    | 151 | 0.2 | 97                  | 2.78                           | <LOD    | 1.50                           | 5.50                           | 129     |
| CCCEH                   | 339 | 0.2 | 97                  | 2.06                           | <LOD    | 1.20                           | 4.10                           | 32.7    |
| HOME                    | 217 | 0.2 | 98                  | 1.73                           | <LOD    | 0.900                          | 3.60                           | 23.6    |
| Pooled                  | 707 |     | 97                  | 2.08                           | <LOD    | 1.10                           | 4.30                           | 129     |
| <b>MBzP</b>             |     |     |                     |                                |         |                                |                                |         |
| MSSM                    | 151 | 0.1 | 99                  | 13.3                           | <LOD    | 4.75                           | 29.8                           | 481     |
| CCCEH                   | 339 | 0.2 | 100                 | 13.5                           | <LOD    | 5.76                           | 31.4                           | 550     |
| HOME                    | 217 | 0.2 | 98                  | 8.25                           | <LOD    | 3.74                           | 22.5                           | 653     |
| Pooled                  | 707 |     | 99                  | 11.6                           | <LOD    | 4.75                           | 28.7                           | 653     |
| <b>DEHP<sup>b</sup></b> |     |     |                     |                                |         |                                |                                |         |
| MSSM                    | 151 | n/a | n/a                 | 0.278                          | <LOD    | 0.129                          | 0.507                          | 19.9    |
| CCCEH                   | 339 | n/a | n/a                 | 0.298                          | <LOD    | 0.141                          | 0.608                          | 18.6    |
| HOME                    | 217 | n/a | n/a                 | 0.248                          | <LOD    | 0.0959                         | 0.537                          | 6.56    |
| Pooled                  | 707 | n/a | n/a                 | 0.277                          | <LOD    | 0.128                          | 0.562                          | 19.9    |
| <b>MECPP</b>            |     |     |                     |                                |         |                                |                                |         |
| MSSM                    | 151 | 0.3 | 99                  | 35.2                           | <LOD    | 15.0                           | 70.1                           | 2055    |
| CCCEH                   | 339 | 0.6 | 100                 | 39.5                           | 3.00    | 19.5                           | 77.9                           | 1840    |
| HOME                    | 217 | 0.6 | 100                 | 30.7                           | 1.70    | 12.6                           | 63.6                           | 641     |
| Pooled                  | 707 |     | 100                 | 35.7                           | <LOD    | 16.1                           | 74.4                           | 2055    |
| <b>MEHHP</b>            |     |     |                     |                                |         |                                |                                |         |
| MSSM                    | 151 | 0.3 | 99                  | 20.6                           | <LOD    | 8.70                           | 39.4                           | 2051    |
| CCCEH                   | 339 | 0.7 | 100                 | 22.5                           | 1.10    | 10.6                           | 48.4                           | 1750    |
| HOME                    | 217 | 0.7 | 100                 | 20.4                           | <LOD    | 8.00                           | 47.0                           | 784     |
| Pooled                  | 707 |     | 100                 | 21.4                           | <LOD    | 9.20                           | 45.1                           | 2051    |

| Metabolite/<br>cohort | N   | LOD | Percent<br>detected | Geometric<br>mean <sup>a</sup> | Minimum | 25 <sup>th</sup><br>percentile | 75 <sup>th</sup><br>percentile | Maximum |
|-----------------------|-----|-----|---------------------|--------------------------------|---------|--------------------------------|--------------------------------|---------|
| <b>MEHP</b>           |     |     |                     |                                |         |                                |                                |         |
| MSSM                  | 151 | 0.9 | 90                  | 5.81                           | <LOD    | 3.00                           | 11.8                           | 478     |
| CCCEH                 | 339 | 1.2 | 83                  | 5.04                           | <LOD    | 2.20                           | 12.8                           | 613     |
| HOME                  | 217 | 1.2 | 77                  | 4.23                           | <LOD    | 1.50                           | 10.8                           | 233     |
| Pooled                | 707 |     | 83                  | 4.92                           | <LOD    | 2.00                           | 11.9                           | 613     |
| <b>MEOHP</b>          |     |     |                     |                                |         |                                |                                |         |
| MSSM                  | 151 | 0.5 | 99                  | 18.3                           | <LOD    | 8.30                           | 37.8                           | 1335    |
| CCCEH                 | 339 | 0.7 | 100                 | 18.7                           | <LOD    | 8.90                           | 37.6                           | 1320    |
| HOME                  | 217 | 0.7 | 99                  | 16.8                           | <LOD    | 6.40                           | 36.9                           | 448     |
| Pooled                | 707 |     | 99                  | 18.0                           | <LOD    | 8.00                           | 37.5                           | 1335    |

Columbia Center for Children's Environmental Health (CCCEH), Health Outcomes and Measures of the Environment Study (HOME), limit of detection (LOD), Mount Sinai School of Medicine Center for Children's Environmental Health (MSSM)

<sup>a</sup> To compute the geometric mean, phthalate metabolite concentrations <LOD were replaced by LOD/ 2.

<sup>b</sup> Units are micromoles per liter.

eTable 2. Age- and sex- standardized body mass index z-score distributions (mean  $\pm$  standard deviation) at follow-up by selected characteristics (N=707; 1,416 follow up visits)

| Group/ category    | <i>n</i> | Body mass index<br>z-score |
|--------------------|----------|----------------------------|
| Overall            | 1,416    | 0.47 $\pm$ 1.20            |
| Cohort             |          |                            |
| MSSM               | 308      | 0.55 $\pm$ 1.13            |
| CCCEH              | 632      | 0.64 $\pm$ 1.32            |
| HOME               | 476      | 0.19 $\pm$ 1.00            |
| Age (years)        |          |                            |
| 4                  | 420      | 0.32 $\pm$ 1.26            |
| 5                  | 361      | 0.36 $\pm$ 1.19            |
| 6                  | 258      | 0.69 $\pm$ 1.18            |
| 7                  | 377      | 0.59 $\pm$ 1.11            |
| Child's sex        |          |                            |
| Girls              | 756      | 0.44 $\pm$ 1.20            |
| Boys               | 660      | 0.50 $\pm$ 1.20            |
| Race/ethnicity     |          |                            |
| Non-Hispanic white | 358      | 0.17 $\pm$ 0.93            |
| Non-Hispanic black | 463      | 0.46 $\pm$ 1.21            |
| Hispanic           | 570      | 0.69 $\pm$ 1.29            |
| Other              | 25       | -0.09 $\pm$ 1.23           |

Columbia Center for Children's Environmental Health (CCCEH), Health Outcomes and Measures of the Environment Study (HOME), Mount Sinai School of Medicine Center for Children's Environmental Health (MSSM), standard deviation (SD)

eTable 3. Adjusted OR (95% CI) for associations between prenatal urinary phthalate metabolite concentrations and overweight/obese status by cohort, child's sex, and race/ethnicity

| Metabolite /cohort | Overall           | Girls             | Boys              | Non-Hispanic white | Non-Hispanic black | Hispanic           |
|--------------------|-------------------|-------------------|-------------------|--------------------|--------------------|--------------------|
| <b>MEP</b>         |                   |                   |                   |                    |                    |                    |
| MSSM               | 0.89 (0.40, 1.98) | 0.79 (0.32, 1.94) | 1.39 (0.46, 4.15) | 0.97 (0.21, 4.36)  | 0.82 (0.32, 2.12)  | 0.86 (0.25, 2.88)  |
| CCCEH              | 0.59 (0.27, 1.26) | 0.58 (0.21, 1.56) | 0.61 (0.21, 1.73) |                    | 0.73 (0.22, 2.36)  | 0.50 (0.18, 1.30)  |
| HOME               | 0.56 (0.25, 1.24) | 0.51 (0.19, 1.31) | 0.66 (0.20, 2.10) | 0.64 (0.20, 2.05)  | 0.50 (0.16, 1.50)  |                    |
| <b>MnBP</b>        |                   |                   |                   |                    |                    |                    |
| MSSM               | 0.69 (0.27, 1.80) | 0.96 (0.32, 2.85) | 0.46 (0.13, 1.60) | 0.63 (0.12, 3.17)  | 0.67 (0.22, 2.05)  | 0.52 (0.12, 2.25)  |
| CCCEH              | 1.18 (0.42, 3.35) | 1.61 (0.46, 5.64) | 0.92 (0.22, 3.77) |                    | 1.23 (0.30, 5.05)  | 1.16 (0.30, 4.39)  |
| HOME               | 1.49 (0.48, 4.60) | 1.60 (0.45, 5.78) | 1.55 (0.28, 8.11) | 1.27 (0.24, 6.42)  | 1.59 (0.38, 6.61)  |                    |
| <b>MiBP</b>        |                   |                   |                   |                    |                    |                    |
| MSSM               | 0.87 (0.34, 2.22) | 0.99 (0.36, 2.78) | 0.68 (0.18, 2.49) | 0.77 (0.16, 3.72)  | 0.55 (0.18, 1.72)  | 0.85 (0.22, 3.34)  |
| CCCEH              | 0.66 (0.24, 1.79) | 0.79 (0.24, 2.56) | 0.37 (0.08, 1.57) |                    | 0.54 (0.13, 2.14)  | 0.60 (0.17, 2.08)  |
| HOME               | 1.03 (0.36, 3.04) | 1.00 (0.29, 3.57) | 0.94 (0.21, 4.35) | 1.16 (0.29, 4.94)  | 0.54 (0.11, 2.55)  |                    |
| <b>MCPP</b>        |                   |                   |                   |                    |                    |                    |
| MSSM               | 2.15 (0.88, 5.31) | 2.94 (1.09, 8.04) | 1.82 (0.53, 6.23) | 1.47 (0.32, 6.68)  | 1.89 (0.64, 5.55)  | 3.84 (1.00, 14.76) |
| CCCEH              | 2.64 (1.14, 6.41) | 3.50 (1.30, 9.96) | 1.93 (0.56, 6.90) |                    | 1.79 (0.53, 6.27)  | 3.74 (1.28, 11.58) |
| HOME               | 1.34 (0.41, 4.45) | 1.95 (0.50, 7.70) | 0.79 (0.16, 4.05) | 0.95 (0.19, 4.77)  | 1.86 (0.41, 8.63)  |                    |
| <b>MBzP</b>        |                   |                   |                   |                    |                    |                    |
| MSSM               | 0.79 (0.31, 1.99) | 0.80 (0.29, 2.20) | 0.85 (0.22, 3.15) | 0.75 (0.15, 3.81)  | 0.69 (0.23, 2.05)  | 0.96 (0.23, 3.92)  |
| CCCEH              | 0.46 (0.20, 1.03) | 0.59 (0.21, 1.62) | 0.42 (0.13, 1.31) |                    | 0.39 (0.11, 1.30)  | 0.49 (0.17, 1.37)  |
| HOME               | 0.78 (0.25, 2.42) | 0.66 (0.19, 2.31) | 1.13 (0.22, 5.67) | 0.80 (0.17, 3.63)  | 1.02 (0.22, 4.62)  |                    |
| <b>DEHP</b>        |                   |                   |                   |                    |                    |                    |
| MSSM               | 0.71 (0.33, 1.51) | 0.59 (0.24, 1.46) | 0.81 (0.30, 2.17) | 1.32 (0.34, 5.10)  | 0.76 (0.28, 2.07)  | 0.44 (0.14, 1.36)  |
| CCCEH              | 0.90 (0.42, 1.92) | 0.67 (0.26, 1.67) | 1.47 (0.46, 4.67) |                    | 1.11 (0.37, 3.29)  | 0.71 (0.26, 1.92)  |
| HOME               | 1.13 (0.44, 2.85) | 0.76 (0.25, 2.28) | 2.06 (0.55, 7.53) | 1.53 (0.48, 4.91)  | 0.96 (0.24, 3.83)  |                    |

Columbia Center for Children's Environmental Health (CCCEH), Health Outcomes and Measures of the Environment Study (HOME), Mount Sinai School of Medicine Center for Children's Environmental Health (MSSM)

Posterior mean of odds ratios (95% credible intervals) per standard deviation increase in natural log phthalate metabolite concentrations estimated in multiple metabolite logistic mixed effects regression models, adjusted for maternal race/ethnicity, maternal age at delivery, maternal education, maternal work status during pregnancy, maternal pre-pregnancy body mass index, maternal height, gestational weight gain, maternal smoking during pregnancy, natural log creatinine, calendar date of urine collection, parity, child's sex, breast feeding, and months of age at follow-up.



eTable 4. Adjusted (95% CI) for associations between prenatal urinary phthalate metabolite concentrations and body mass index z-scores by cohort, child's sex, and race/ethnicity

| Metabolite /cohort | Overall                          | Girls               | Boys                            | Non-Hispanic white  | Non-Hispanic black  | Hispanic            |
|--------------------|----------------------------------|---------------------|---------------------------------|---------------------|---------------------|---------------------|
| <b>MEP</b>         |                                  |                     |                                 |                     |                     |                     |
| MSSM               | 0.14 (-0.09, 0.37)               | 0.03 (-0.28, 0.34)  | 0.29 (-0.03, 0.61)              | 0.06 (-0.44, 0.56)  | 0.08 (-0.26, 0.43)  | 0.15 (-0.19, 0.49)  |
| CCCEH              | -0.10 (-0.27, 0.07) <sup>a</sup> | -0.14 (-0.37, 0.09) | -0.02 (-0.25, 0.21)             |                     | 0.03 (-0.26, 0.31)  | -0.16 (-0.36, 0.05) |
| HOME               | -0.06 (-0.22, 0.09) <sup>a</sup> | -0.20 (-0.41, 0.00) | 0.11 (-0.12, 0.34) <sup>b</sup> | 0.01 (-0.21, 0.23)  | -0.11 (-0.36, 0.14) |                     |
| <b>MnBP</b>        |                                  |                     |                                 |                     |                     |                     |
| MSSM               | -0.23 (-0.54, 0.09)              | -0.04 (-0.52, 0.45) | -0.27 (-0.64, 0.10)             | -0.16 (-0.73, 0.41) | -0.27 (-0.74, 0.21) | -0.29 (-0.77, 0.19) |
| CCCEH              | 0.04 (-0.21, 0.28) <sup>a</sup>  | 0.27 (-0.07, 0.61)  | -0.17 (-0.51, 0.17)             |                     | -0.17 (-0.61, 0.27) | 0.15 (-0.15, 0.44)  |
| HOME               | 0.18 (-0.07, 0.44) <sup>a</sup>  | 0.18 (-0.16, 0.52)  | 0.19 (-0.16, 0.55)              | 0.08 (-0.24, 0.40)  | 0.21 (-0.22, 0.64)  |                     |
| <b>MiBP</b>        |                                  |                     |                                 |                     |                     |                     |
| MSSM               | -0.02 (-0.30, 0.27)              | 0.04 (-0.33, 0.40)  | -0.14 (-0.54, 0.25)             | -0.39 (-0.95, 0.17) | -0.16 (-0.69, 0.38) | 0.03 (-0.37, 0.42)  |
| CCCEH              | 0.05 (-0.19, 0.29)               | -0.08 (-0.40, 0.23) | 0.07 (-0.27, 0.41)              |                     | 0.21 (-0.22, 0.63)  | -0.01 (-0.29, 0.28) |
| HOME               | -0.02 (-0.24, 0.21)              | -0.11 (-0.41, 0.20) | 0.03 (-0.27, 0.34)              | 0.05 (-0.22, 0.32)  | -0.19 (-0.67, 0.28) |                     |
| <b>MCPP</b>        |                                  |                     |                                 |                     |                     |                     |
| MSSM               | 0.17 (-0.12, 0.46)               | 0.19 (-0.17, 0.55)  | 0.15 (-0.25, 0.55)              | -0.05 (-0.54, 0.44) | 0.19 (-0.30, 0.67)  | 0.40 (-0.03, 0.83)  |
| CCCEH              | -0.05 (-0.23, 0.13) <sup>a</sup> | 0.06 (-0.17, 0.29)  | -0.17 (-0.45, 0.12)             |                     | -0.09 (-0.42, 0.23) | -0.03 (-0.25, 0.18) |
| HOME               | -0.05 (-0.31, 0.21)              | -0.03 (-0.41, 0.34) | -0.07 (-0.41, 0.28)             | -0.10 (-0.42, 0.22) | 0.21 (-0.27, 0.70)  |                     |
| <b>MBzP</b>        |                                  |                     |                                 |                     |                     |                     |
| MSSM               | -0.03 (-0.34, 0.27)              | -0.02 (-0.39, 0.35) | -0.12 (-0.59, 0.35)             | -0.03 (-0.63, 0.57) | 0.07 (-0.42, 0.56)  | -0.01 (-0.45, 0.42) |
| CCCEH              | -0.09 (-0.27, 0.09)              | -0.08 (-0.33, 0.17) | -0.03 (-0.28, 0.23)             |                     | -0.12 (-0.44, 0.2)  | -0.07 (-0.30, 0.15) |
| HOME               | -0.13 (-0.38, 0.11)              | -0.12 (-0.44, 0.19) | -0.15 (-0.51, 0.21)             | -0.18 (-0.47, 0.12) | -0.03 (-0.50, 0.43) |                     |
| <b>DEHP</b>        |                                  |                     |                                 |                     |                     |                     |
| MSSM               | -0.13 (-0.32, 0.07)              | -0.16 (-0.46, 0.14) | -0.06 (-0.32, 0.20)             | 0.28 (-0.12, 0.68)  | -0.20 (-0.60, 0.20) | -0.28 (-0.56, 0.00) |
| CCCEH              | -0.05 (-0.21, 0.12)              | -0.19 (-0.40, 0.03) | 0.12 (-0.15, 0.38)              |                     | -0.06 (-0.34, 0.21) | -0.05 (-0.26, 0.17) |
| HOME               | 0.05 (-0.14, 0.24)               | 0.03 (-0.23, 0.28)  | 0.10 (-0.18, 0.37)              | 0.07 (-0.15, 0.30)  | -0.02 (-0.44, 0.40) |                     |

Columbia Center for Children's Environmental Health (CCCEH), Health Outcomes and Measures of the Environment Study (HOME), Mount Sinai School of Medicine Center for Children's Environmental Health (MSSM)

Posterior mean of beta coefficients (95% credible intervals) per standard deviation increase in natural log phthalate metabolite concentrations estimated in multiple metabolite linear mixed effects regression models, adjusted for maternal race/ethnicity, maternal age at delivery, maternal education, maternal work status during pregnancy, maternal pre-pregnancy body mass index, maternal height, gestational weight gain, maternal smoking during pregnancy, natural log creatinine, calendar date of urine collection, parity, child's sex, breast feeding, and months of age at follow-up.

<sup>a</sup> Met criteria for heterogeneity compared to MSSM.

<sup>b</sup> Met criteria for heterogeneity compared to girls in the same cohort.

eTable 5. Sensitivity analyses for confounding among metabolites and loss to follow-up

| Metabolite/outcome            | Multiple metabolite models <sup>a</sup><br>(N = 707) | Single metabolite models <sup>b</sup><br>(N = 707) | Multiple metabolite models accounting for loss to follow-up <sup>c</sup><br>(N = 1143) |
|-------------------------------|------------------------------------------------------|----------------------------------------------------|----------------------------------------------------------------------------------------|
| <b>MEP</b>                    |                                                      |                                                    |                                                                                        |
| Overweight/obese <sup>d</sup> | 0.68 (0.42, 1.08)                                    | 0.66 (0.42, 1.03)                                  | 0.69 (0.43, 1.12)                                                                      |
| BMI z-score <sup>e</sup>      | -0.05 (-0.15, 0.05)                                  | -0.06 (-0.15, 0.03)                                | -0.05 (-0.15, 0.05)                                                                    |
| <b>MnBP</b>                   |                                                      |                                                    |                                                                                        |
| Overweight/obese <sup>d</sup> | 1.00 (0.51, 1.98)                                    | 0.91 (0.56, 1.50)                                  | 0.96 (0.48, 1.90)                                                                      |
| BMI z-score <sup>e</sup>      | 0.03 (-0.12, 0.18)                                   | -0.03 (-0.14, 0.08)                                | 0.01 (-0.14, 0.16)                                                                     |
| <b>MiBP</b>                   |                                                      |                                                    |                                                                                        |
| Overweight/obese <sup>d</sup> | 0.84 (0.44, 1.63)                                    | 0.78 (0.46, 1.31)                                  | 0.87 (0.45, 1.68)                                                                      |
| BMI z-score <sup>e</sup>      | 0.01 (-0.14, 0.15)                                   | -0.04 (-0.15, 0.08)                                | 0.03 (-0.11, 0.18)                                                                     |
| <b>MCPP</b>                   |                                                      |                                                    |                                                                                        |
| Overweight/obese <sup>d</sup> | 2.12 (1.16, 3.96)                                    | 1.42 (0.88, 2.30)                                  | 2.25 (1.23, 4.18)                                                                      |
| BMI z-score <sup>e</sup>      | -0.02 (-0.15, 0.11)                                  | -0.05 (-0.16, 0.05)                                | 0.01 (-0.13, 0.14)                                                                     |
| <b>MBzP</b>                   |                                                      |                                                    |                                                                                        |
| Overweight/obese <sup>d</sup> | 0.63 (0.34, 1.15)                                    | 0.71 (0.44, 1.15)                                  | 0.62 (0.34, 1.13)                                                                      |
| BMI z-score <sup>e</sup>      | -0.07 (-0.20, 0.06)                                  | -0.08 (-0.19, 0.02)                                | -0.07 (-0.20, 0.06)                                                                    |
| <b>DEHP</b>                   |                                                      |                                                    |                                                                                        |
| Overweight/obese <sup>d</sup> | 0.87 (0.53, 1.42)                                    | 0.89 (0.57, 1.38)                                  | 0.87 (0.53, 1.41)                                                                      |
| BMI z-score <sup>e</sup>      | -0.04 (-0.15, 0.06)                                  | -0.07 (-0.16, 0.03)                                | -0.04 (-0.14, 0.07)                                                                    |

**Body mass index (BMI)**

Associations per standard deviation increase in natural log phthalate metabolite concentrations, adjusted for cohort, maternal race/ethnicity, maternal age at delivery, maternal education, maternal work status during pregnancy, maternal pre-pregnancy BMI, maternal height, gestational weight gain, maternal smoking during pregnancy, natural log creatinine, calendar date of urine collection, parity, child's sex, breast feeding, and months of age at follow-up.

<sup>a</sup> Associations among children with at least one follow-up visit estimated in a multiple metabolite linear mixed effects regression model (primary analysis).

<sup>b</sup> Associations among children with at least one follow-up visit estimated in a separate linear mixed effects regression model for each metabolite.

<sup>c</sup> Associations among all children with measured prenatal phthalate metabolite concentrations estimated in a multiple metabolite linear mixed effects regression model using a selection model for nonignorable missing outcome data.

<sup>d</sup> Posterior mean of odds ratios (95% credible intervals).

<sup>e</sup> Posterior mean of beta coefficients (95% credible intervals).
